# Supplementary material for: Influence of Thiol-Functionalized Polysilsesquioxane/Phosphorus Flame-Retardant Blends on the Flammability and Thermal, Mechanical, and Volatile Organic Compound (VOC) Emission Properties of Epoxy Resins
Source: MDPI journal article supplement (doi:10.3390/polym16060842), 2024-03-19
Supplement: s1 [file s1]

# Influence of Thiol-Functionalized Polysilsesquioxane/Phosphorus Flame-Retardant Blends on the Flammability and Thermal, Mechanical, and Volatile Organic Compound (VOC) Emission Properties of Epoxy Resins

Young-Hun Kim <sup>1,2</sup>, Jeong Ju Baek <sup>1</sup>, Ki Cheol Chang <sup>1</sup>, Ho Sun Lim <sup>3</sup>, Myung-Seok Choi <sup>4</sup>, Won-Gun Koh <sup>2,\*</sup> and Gyojic Shin <sup>1,\*</sup>

<sup>1</sup> Green Circulation R&D Department, Research Institute of Sustainable Development Technology, Korea Institute of Industrial Technology (KITECH), Yangdaegiro-gil 89, Ipjang-myeon, Cheonan-si 31056, Republic of Korea; kimyh@kitech.re.kr (Y.-H.K.); baekjj@kitech.re.kr (J.J.B.); kcchang@kitech.re.kr (K.C.C.)

<sup>2</sup> Department of Chemical and Biomolecular Engineering, Yonsei University, Yonsei-ro 50, Seodaemun-gu, Seoul 03722, Republic of Korea

<sup>3</sup> Department of Chemical and Biological Engineering, Institute of Advanced Materials and System, Sookmyung Women's University, Seoul 04310, Republic of Korea; limhs@sookmyung.ac.kr

<sup>4</sup> Division of Chemical Engineering, Konkuk University, 120 Neungdong-ro, Gwangjin-gu, Seoul 05029, Republic of Korea; mchoi@konkuk.ac.kr

\* Correspondence: wongun@yonsei.ac.kr (W.-G.K.); gyshin@kitech.re.kr (G.S.)

Figure S1a,b presents similar <sup>1</sup>H NMR spectra for synthesized TFLPM and TFLPP, confirming the successful grafting of mercaptopropyl arms through characteristic peaks. Four signals in the spectra correspond to the mercaptopropyl chain repeat unit: methylene protons (a, b, c) and the thiol proton (d). Additionally, the TFLPM spectrum exhibited peaks at  $\delta$  0.07–0.12 ppm, attributed to the Si-CH<sub>3</sub> group. The TFLPP spectrum exhibited peaks at  $\delta$  7.38–7.56 ppm, attributed to the Si-PH group. Calibration with CDCl<sub>3</sub> solvent yielded a peak chemical shift [ $\delta$ ] of 7.3 ppm.

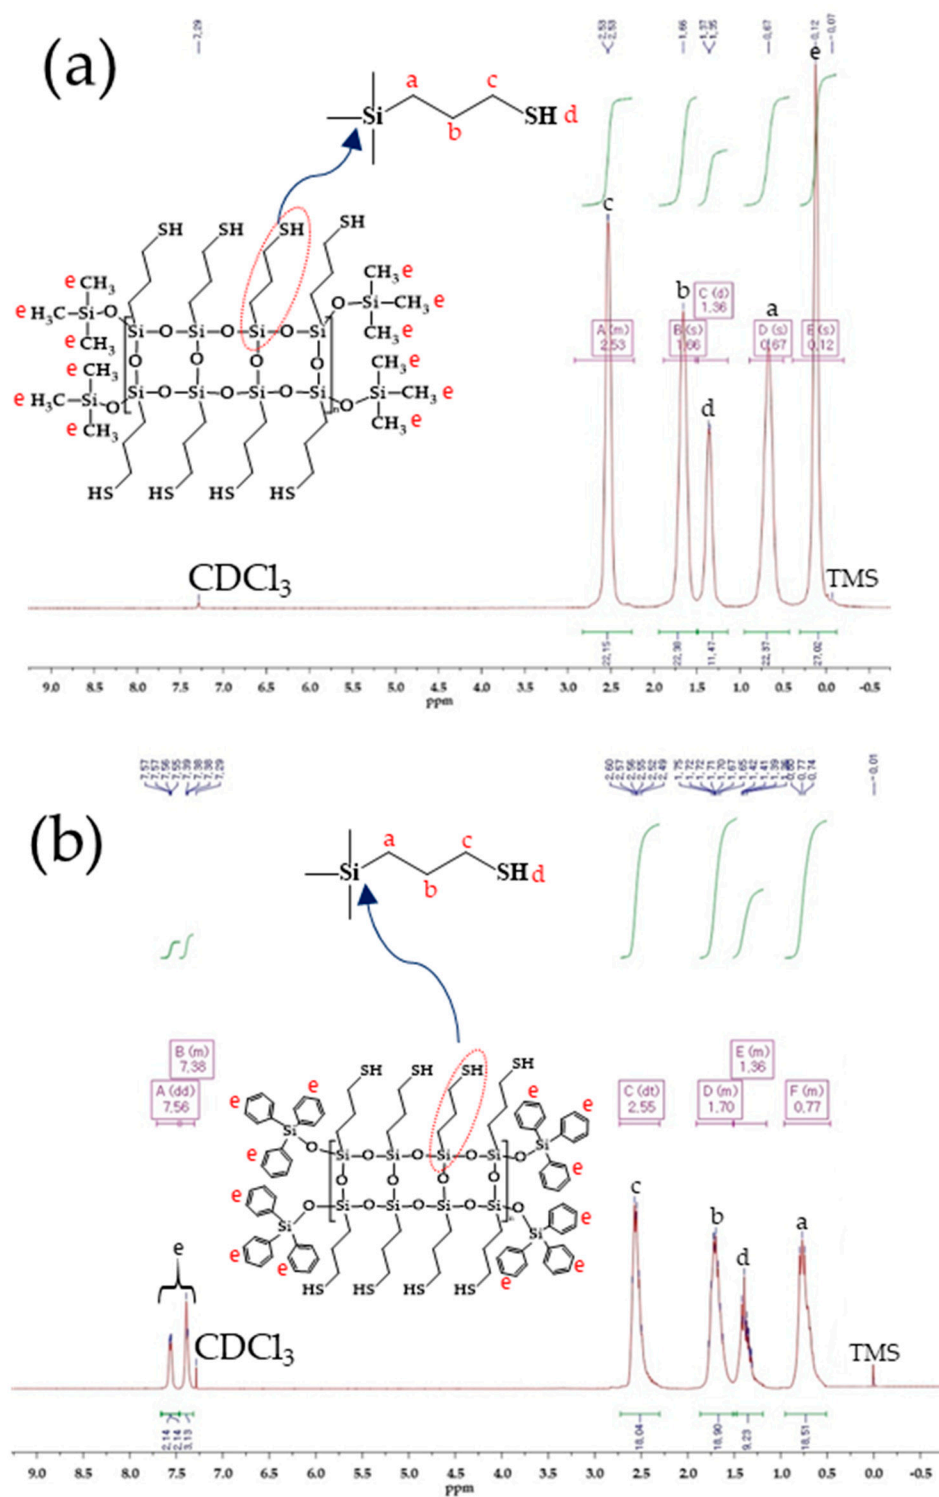

Figure S1.  $^1\text{H}$  NMR Spectra of (a) TFLPM and (b) TFLPP.

Consistent with the  $^1\text{H}$  NMR findings, the  $^{13}\text{C}$  NMR spectra of TFLPM and TFLPP in Figure S2a,b exhibit peaks confirming the presence of grafted mercaptopropyl arms. In both TFLPM and TFLPP, two signals corresponding to methylene carbons a and b, c were assigned to the mercaptopropyl repeating unit. The TFLPM spectrum exhibited a peak at  $\delta$  1.44 ppm due to the Si-CH<sub>3</sub> group, while TFLPP presented peaks at  $\delta$  127.82 (ortho-C),  $\delta$  130.28 (para-C), and  $\delta$  134.06 ppm (meta-C) arising from the presence of phenyl groups. The 77 ppm triplet observed in the  $^{13}\text{C}$  NMR spectrum indicates coupling between the carbon of the solvent CDCl<sub>3</sub> and deuterium ( $I = 1$ ).

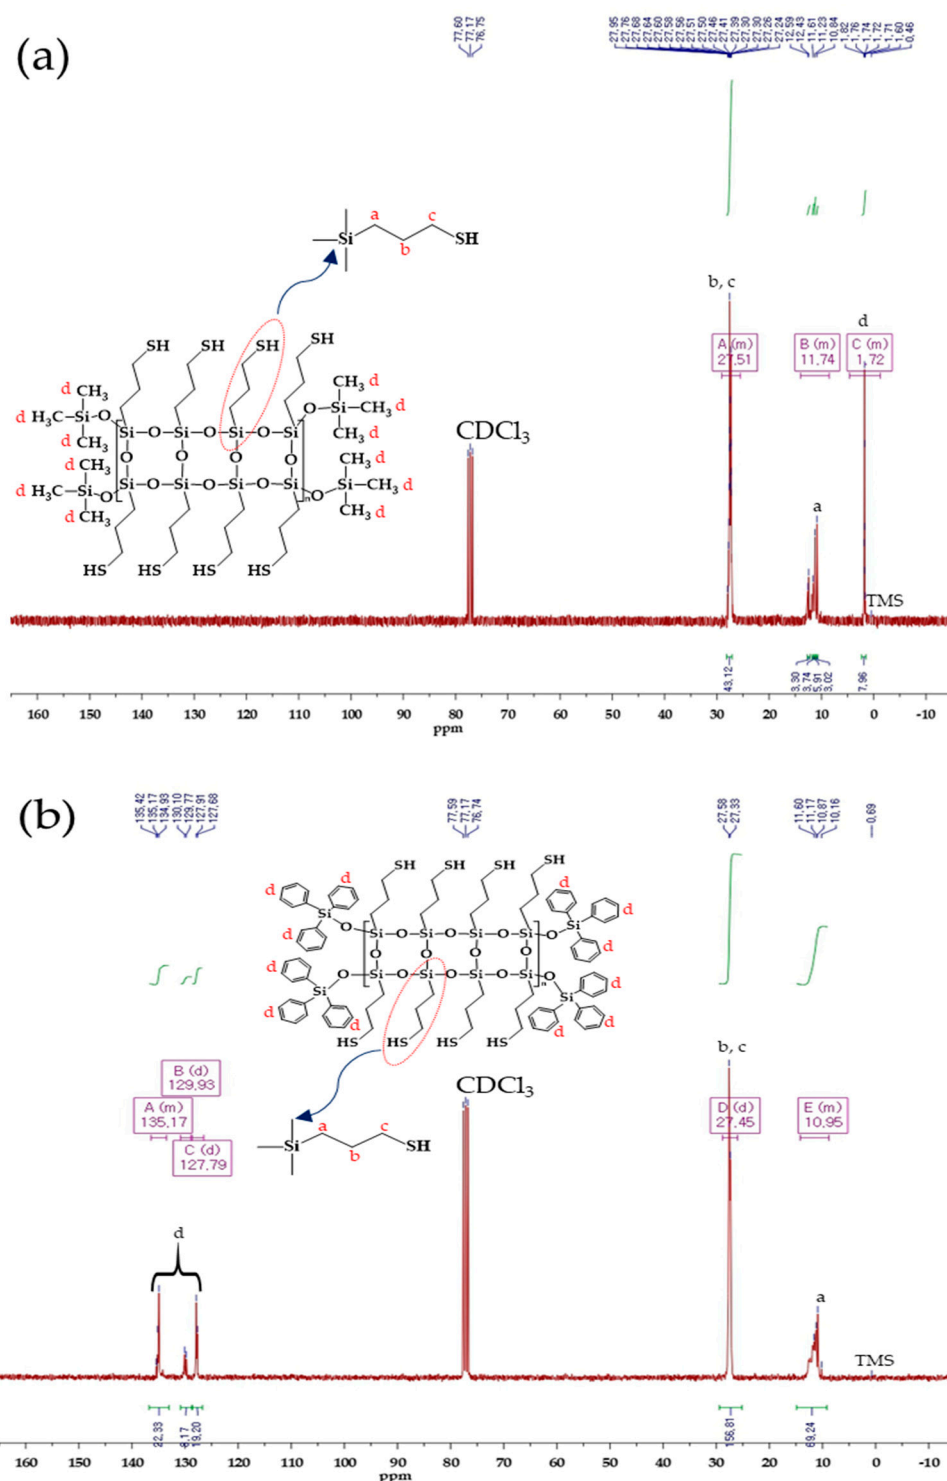

**Figure S2.**  $^{13}\text{C}$  NMR Spectra of (a) TFLPM and (b) TFLPP.

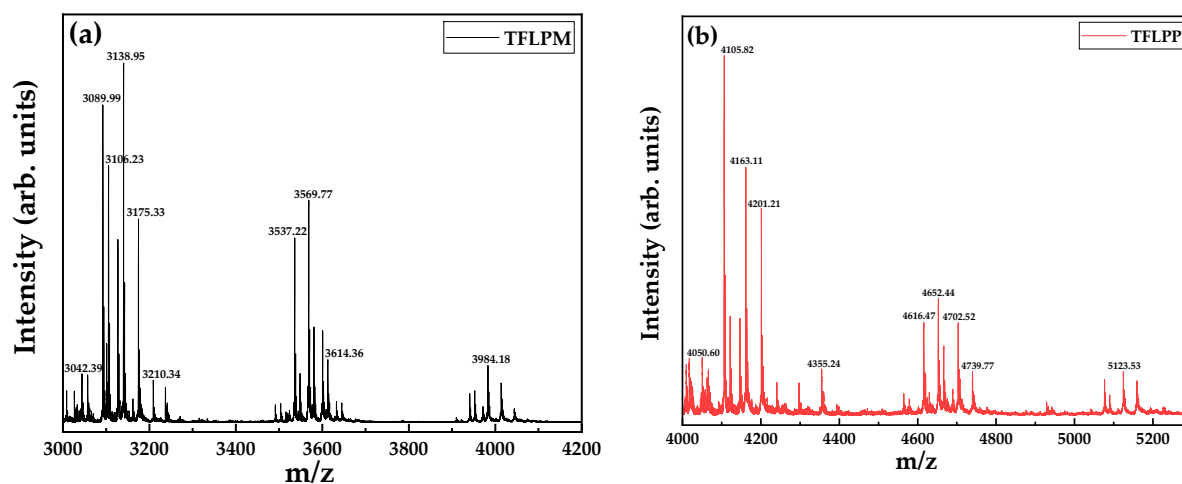

Figure S3. MALDI-TOF MS spectra of (a) TFLPM and (b) TFLPP.

Table S1. Specific requirements of the UL 94 V test

| Criteria                                                                                       | Category |        |        |
|------------------------------------------------------------------------------------------------|----------|--------|--------|
|                                                                                                | V-0      | V-1    | V-2    |
| Burning time of each individual test specimen                                                  | ≤10 s    | ≤30 s  | ≤30 s  |
| Total after flame time for any condition set<br>[ 5 flame applications]                        | ≤50 s    | ≤250 s | ≤250 s |
| Individual test specimen after flame plus afterglow time<br>after the second flame application | ≤30 s    | ≤60 s  | ≤60 s  |
| Dripping of burning specimens<br>[ignition of cotton batting]                                  | No       | No     | Yes    |
| Combustion up to holding clamp<br>[specimens completely burned]                                | No       | No     | No     |
